# Supplementary material
Source: publisher site journal article supplement (https://www.dovepress.com/get_supplementary_file.php?f=383152.docx)
Supplement: Supplementary file 1 [file get_supplementary_file.php]

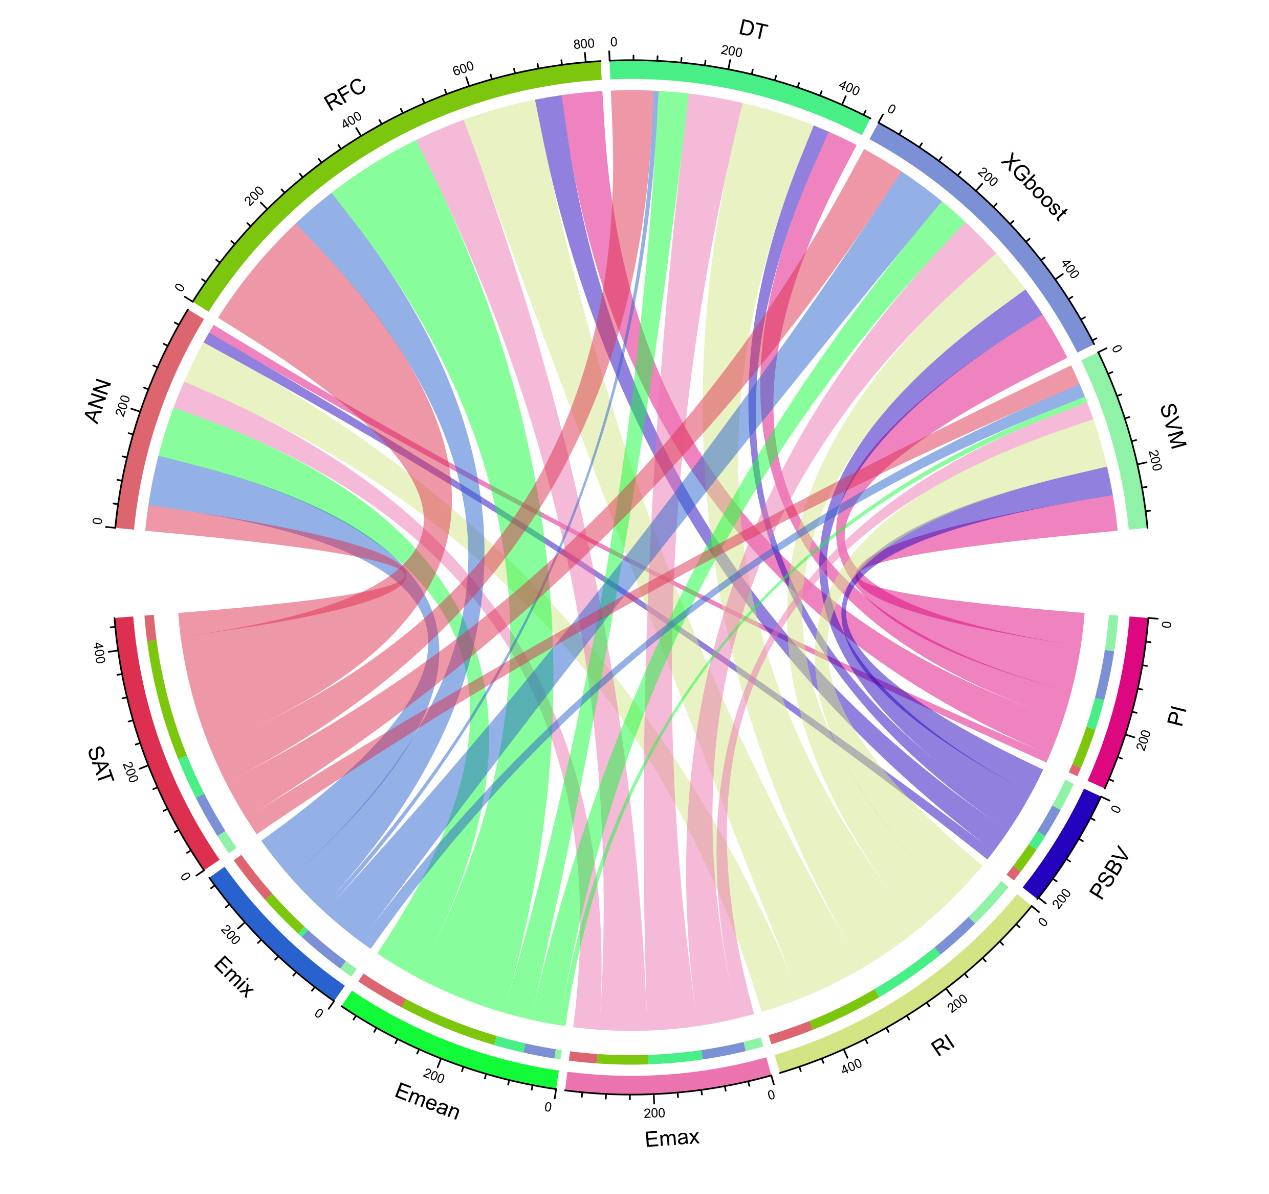


Supplementary Figure1 Weight distribution of shear wave elastic imaging value analysis index in machine learning model

Notes. the flow direction in the chord diagram represents the weight distribution of each candidate variable in different machine learning models. The wider the curvature of its flow direction, the greater the weight ratio of the variable, and vice versa.

Supplementary Table1 Comparison of baseline data of lymph node metastasis in different regions

| **Variables** | **Overall(N=111)** | **Central area(N=87)** | **Lateral cervical area(N=24)** | **P-value** |
| --- | --- | --- | --- | --- |
| **Age (median [IQR]),year** | 39.00 [29.00, 50.00] | 41.00 [29.00, 51.00] | 38.00 [30.50, 45.25] | 0.514 |
| **Sex (%)** |  |  |  |  |
| male | 87 (78.4) | 68 (78.2) | 19 (79.2) | 1 |
| female | 24 (21.6) | 19 (21.8) | 5 (20.8) |  |
| **Course of disease (%),month** |  |  |  |  |
| ≥6 | 80 (72.1) | 59 (67.8) | 21 (87.5) | 0.1 |
| ＜6 | 31 (27.9) | 28 (32.2) | 3 (12.5) |  |
| **Number of lesions (%)** |  |  |  |  |
| ≥1 | 81 (73.0) | 66 (75.9) | 15 (62.5) | 0.296 |
| ＜1 | 30 (27.0) | 21 (24.1) | 9 (37.5) |  |
| **Hashimoto (%)** |  |  |  |  |
| yes | 26 (23.4) | 18 (20.7) | 8 (33.3) | 0.306 |
| no | 85 (76.6) | 69 (79.3) | 16 (66.7) |  |
| **TSH (%),μIU/ml** |  |  |  |  |
| normal | 87 (78.4) | 70 (80.5) | 17 (70.8) | 0.463 |
| abnormal | 24 (21.6) | 17 (19.5) | 7 (29.2) |  |
| **Capsule invasion (%)** |  |  |  |  |
| yes | 88 (79.3) | 67 (77.0) | 21 (87.5) | 0.402 |
| no | 23 (20.7) | 20 (23.0) | 3 (12.5) |  |
| **Location of disease (%)** |  |  |  |  |
| glandular lobe | 90 (81.1) | 68 (78.2) | 22 (91.7) | 0.23 |
| isthmus | 21 (18.9) | 19 (21.8) | 2 (8.3) |  |
| **Focus scope (%)** |  |  |  |  |
| unilateral | 94 (84.7) | 73 (83.9) | 21 (87.5) | 0.91 |
| bilateral | 17 (15.3) | 14 (16.1) | 3 (12.5) |  |
| **Calcification (%)** |  |  |  |  |
| yes | 35 (31.5) | 22 (25.3) | 13 (54.2) | 0.014 |
| no | 76 (68.5) | 65 (74.7) | 11 (45.8) |  |
| **Aspect ratio (%)** |  |  |  |  |
| ＜1 | 77 (69.4) | 62 (71.3) | 15 (62.5) | 0.566 |
| ≥1 | 34 (30.6) | 25 (28.7) | 9 (37.5) |  |
| **Blood flow (%)** |  |  |  |  |
| abundant | 79 (71.2) | 64 (73.6) | 15 (62.5) | 0.421 |
| insufficient | 32 (28.8) | 23 (26.4) | 9 (37.5) |  |
| **Blood flow typing (%)** |  |  |  |  |
| without blood flow | 15 (13.5) | 12 (13.8) | 3 (12.5) | 0.196 |
| peripheral | 44 (39.6) | 36 (41.4) | 8 (33.3) |  |
| central type | 43 (38.7) | 30 (34.5) | 13 (54.2) |  |
| mixed type | 9 (8.1) | 9 (10.3) | 0 (0.0) |  |
| **Echo intensity (%)** |  |  |  |  |
| medium-high | 73 (65.8) | 58 (66.7) | 15 (62.5) | 0.89 |
| low | 38 (34.2) | 29 (33.3) | 9 (37.5) |  |
| **Tumor diameter (%),mm** |  |  |  |  |
| ＞5 | 88 (79.3) | 69 (79.3) | 19 (79.2) | 1 |
| ≤5 | 23 (20.7) | 18 (20.7) | 5 (20.8) |  |
| **Lesion margin (%)** |  |  |  |  |
| regular | 27 (24.3) | 21 (24.1) | 6 (25.0) | 1 |
| irregular | 84 (75.7) | 66 (75.9) | 18 (75.0) |  |
| **BRAF (%)** |  |  |  |  |
| mutant | 32 (28.8) | 25 (28.7) | 7 (29.2) | 1 |
| wild type | 79 (71.2) | 62 (71.3) | 17 (70.8) |  |
| **SAT (median [IQR]), AT/ms** | 134.00 [123.50, 146.00] | 136.00 [124.50, 146.00] | 128.50 [120.50, 145.50] | 0.271 |
| **PSBV (median [IQR]), cm/s** | 45.00 [42.00, 47.50] | 44.00 [41.00, 47.00] | 46.00 [45.00, 49.25] | 0.019 |
| **PI (median [IQR])** | 2.38 [2.12, 2.66] | 2.35 [2.10, 2.68] | 2.44 [2.17, 2.56] | 0.827 |
| **RI (median [IQR])** | 0.76 [0.72, 0.80] | 0.75 [0.72, 0.80] | 0.78 [0.74, 0.79] | 0.369 |
| **Emean (median [IQR])** | 105.00 [92.50, 117.50] | 108.00 [93.00, 118.00] | 100.50 [90.75, 114.50] | 0.535 |
| **Emax (median [IQR])** | 127.00 [112.00, 139.50] | 126.00 [112.50, 139.50] | 130.00 [109.75, 139.50] | 0.94 |
| **Emix (median [IQR])** | 72.00 [63.00, 81.50] | 72.00 [63.50, 82.00] | 71.50 [62.00, 77.75] | 0.521 |

Abbreviations: IQR. inter-quartile range;TSH. thyroid stimulating hormone;SAT. Systolic acceleration time;PSBV. Peak systolic blood flow velocity;PI. Pulsatility Index;RI. Resistance index;Emean. Average value;Emax. Maximum value;Emix. Minimum value.

Supplementary Table2 Weight distribution of various candidate variables based on random forest classifier algorithm

| **Variables** | **Mean decrease accuracy** | **Mean decrease Gini** |
| --- | --- | --- |
| **Age** | 1.374185018 | 0.001163495 |
| **Sex** | 1.03557958 | 0.469853922 |
| **Course of disease** | 1.000500375 | 0.031458574 |
| **Number of lesions** | 1.618491605 | 0.168012866 |
| **Hashimoto** | 9.41E-35 | 1.49E-15 |
| **TSH** | -1.11E-34 | 0.000833333 |
| **Capsule invasion** | 2.274955082 | 1.286125091 |
| **Location of disease** | -1.10E-35 | 1.53E-15 |
| **Focus scope** | -1.000500375 | 0.0009 |
| **Calcification** | 1.206637713 | 0.001524219 |
| **Aspect ratio** | 1.404753505 | 0.003558015 |
| **Blood flow** | 1.221865116 | 0.059325894 |
| **Blood flow typing** | -1.000500375 | 6.29E-15 |
| **Echo intensity** | 0.479287508 | 0.004041075 |
| **Tumor diameter** | 1.139390259 | 0.274625895 |
| **Lesion margin** | 1.369881861 | 0.256590643 |
| **BRAF** | 1.11E-34 | 3.35E-15 |
| **SAT** | 2.655536689 | 0.023101697 |
| **PSBV** | 23.81756319 | 23.61718154 |
| **PI** | 25.39744809 | 25.43459659 |
| **RI** | 18.56693362 | 16.19699218 |
| **Emean** | 10.44510269 | 4.360425823 |
| **Emax** | 10.18199827 | 6.004038423 |
| **Emix** | 7.371312847 | 0.868968296 |

Abbreviations: TSH. thyroid stimulating hormone;SAT. Systolic acceleration time;PSBV. Peak systolic blood flow velocity;PI. Pulsatility Index;RI. Resistance index;Emean. Average value;Emax. Maximum value;Emix. Minimum value.
